# Supplementary material for: Parathyroid hormone–dependent bone formation requires butyrate production by intestinal microbiota
Source: JCI journal article supplement (doi:10.1172/jci133473), 2020-01-09
Supplement: sd1 [file 1]

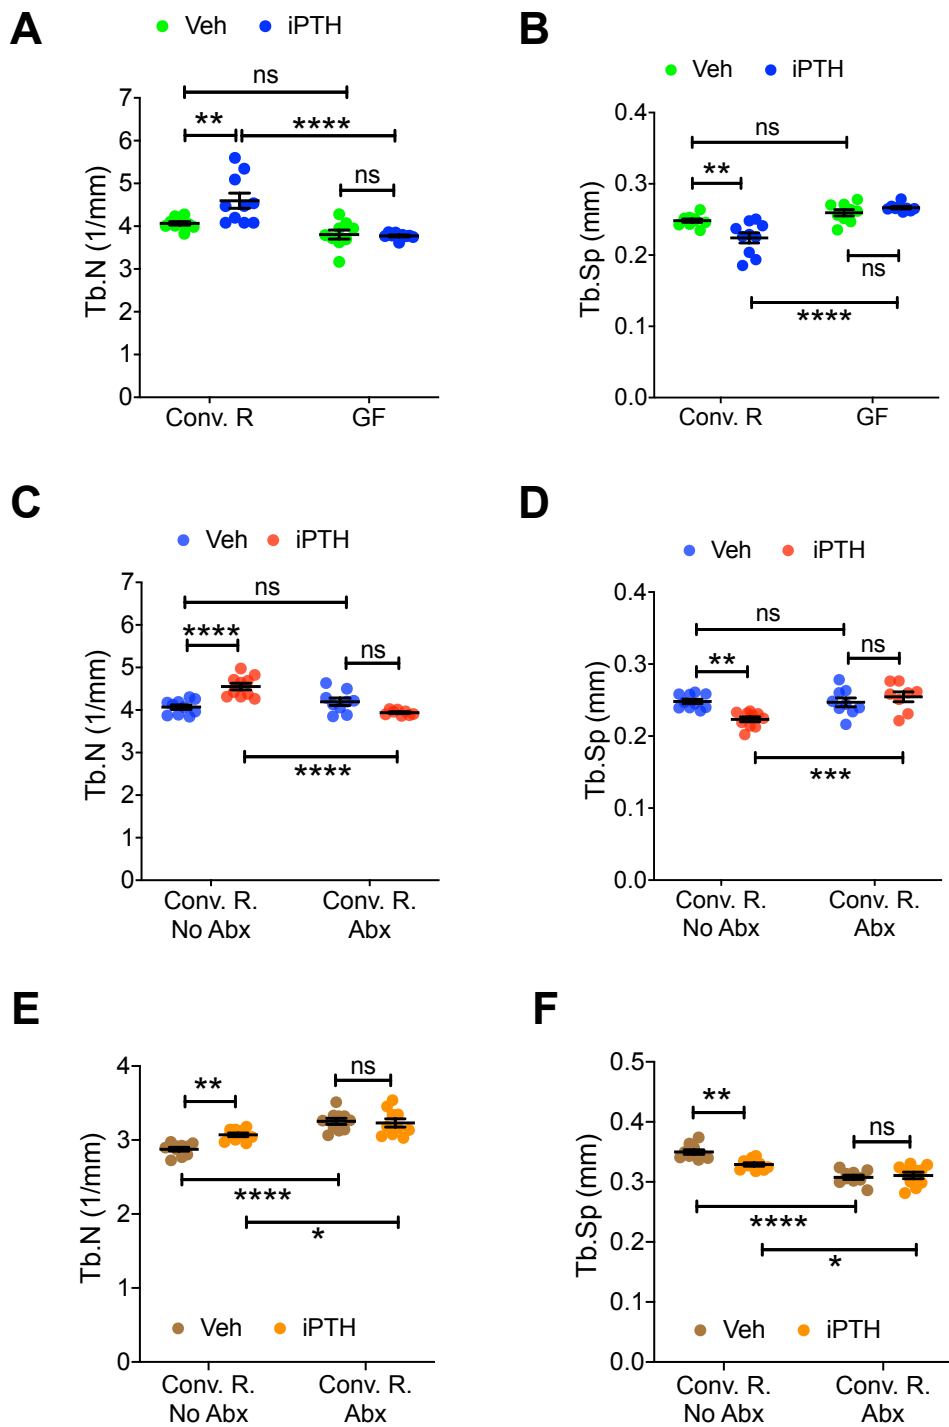

**Supplemental figure 1. iPTH does not improve indices of trabecular bone structure in young and old Conv. R. mice treated with antibiotics (Abx) and in GF mice.** The figure shows measurements of femoral indices of trabecular structure by in vitro  $\mu$ CT scanning. **A,B.** Trabecular Number (Tb.N) and Trabecular Separation (Tb.Sp) in 12-week-old Conv. R. mice and GF mice. **C,D.** Tb.N and Tb.Sp in 12-week-old Conv. R. mice treated or not treated with Abx. **E,F.** Tb.N and Tb.Sp in 7-month-old Conv. R. mice treated or not treated with Abx.  $n = 8-10$  mice per group. Data are expressed as Mean  $\pm$  SEM. All data were normally distributed according to the Shapiro-Wilk normality test. Data were analyzed by two-way ANOVA and post hoc tests applying the Bonferroni correction for multiple comparisons. \* =  $p < 0.05$ , \*\* =  $p < 0.01$ , \*\*\* =  $p < 0.001$  and \*\*\*\* =  $p < 0.0001$  compared to the indicated group. ns = not significant.

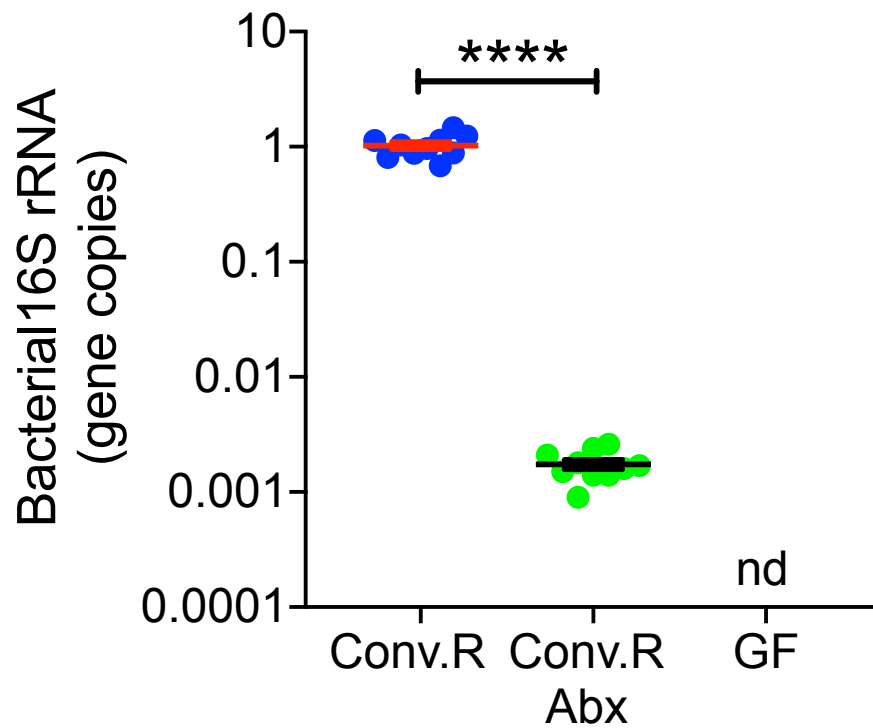

**Supplemental figure 2. Number of universal bacteria in Conv. R mice treated with antibiotics (Abx) and in GF mice.** Genomic DNA was isolated from equal amounts of fecal material of Conv. R mice, Conv. R mice treated with Abx, and GF mice. Relative quantitation of 16S rRNA gene copies of total bacteria were determined by qPCR, using universal 16S rRNA primers.  $n = 10$  mice per group. Data are expressed as Mean  $\pm$  SEM. Data were analyzed by unpaired t-tests. \*\*\*\* =  $p < 0.0001$ . nd = not detectable. nd = not detectable.

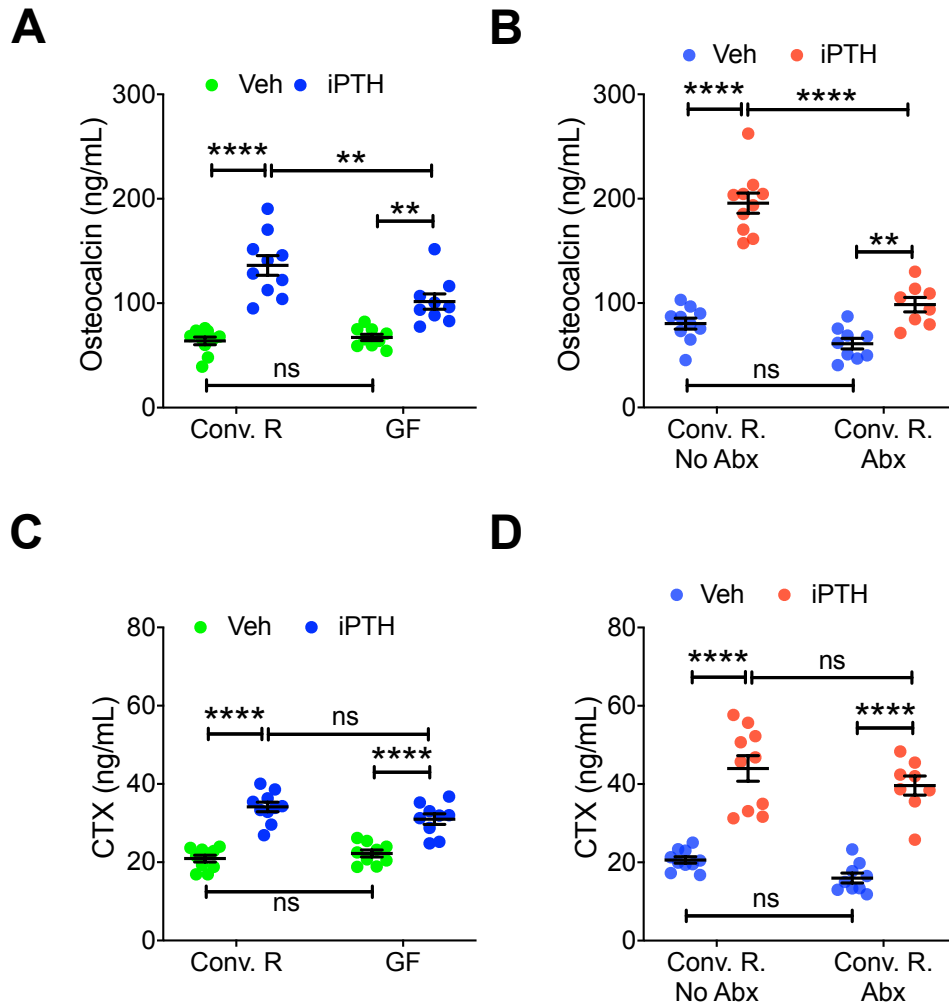

**Supplemental figure 3. Microbiota depletion by antibiotic treatment does not block the capacity of iPTH to increases biochemical markers of bone turnover.** **A,B.** Serum levels of osteocalcin (OCN), a marker of bone formation. **C,D.** Serum levels of type 1 cross-linked C-telopeptide (CTX), a marker of resorption. GF mice and Conv. R. mice were treated with iPTH or vehicle for 4 weeks. Conv. R. mice were also treated with and without antibiotics (Abx). Mice were sacrificed and analyzed at 12 weeks of age.  $n = 8-10$  mice per group. Data are expressed as Mean  $\pm$  SEM. All data were normally distributed according to the Shapiro-Wilk normality test. Data were analyzed by two-way ANOVA and post hoc tests applying the Bonferroni correction for multiple comparisons. \* =  $p < 0.05$ , \*\* =  $p < 0.01$ , \*\*\* =  $p < 0.001$  and \*\*\*\* =  $p < 0.0001$  compared to the indicated group. ns = not significant.

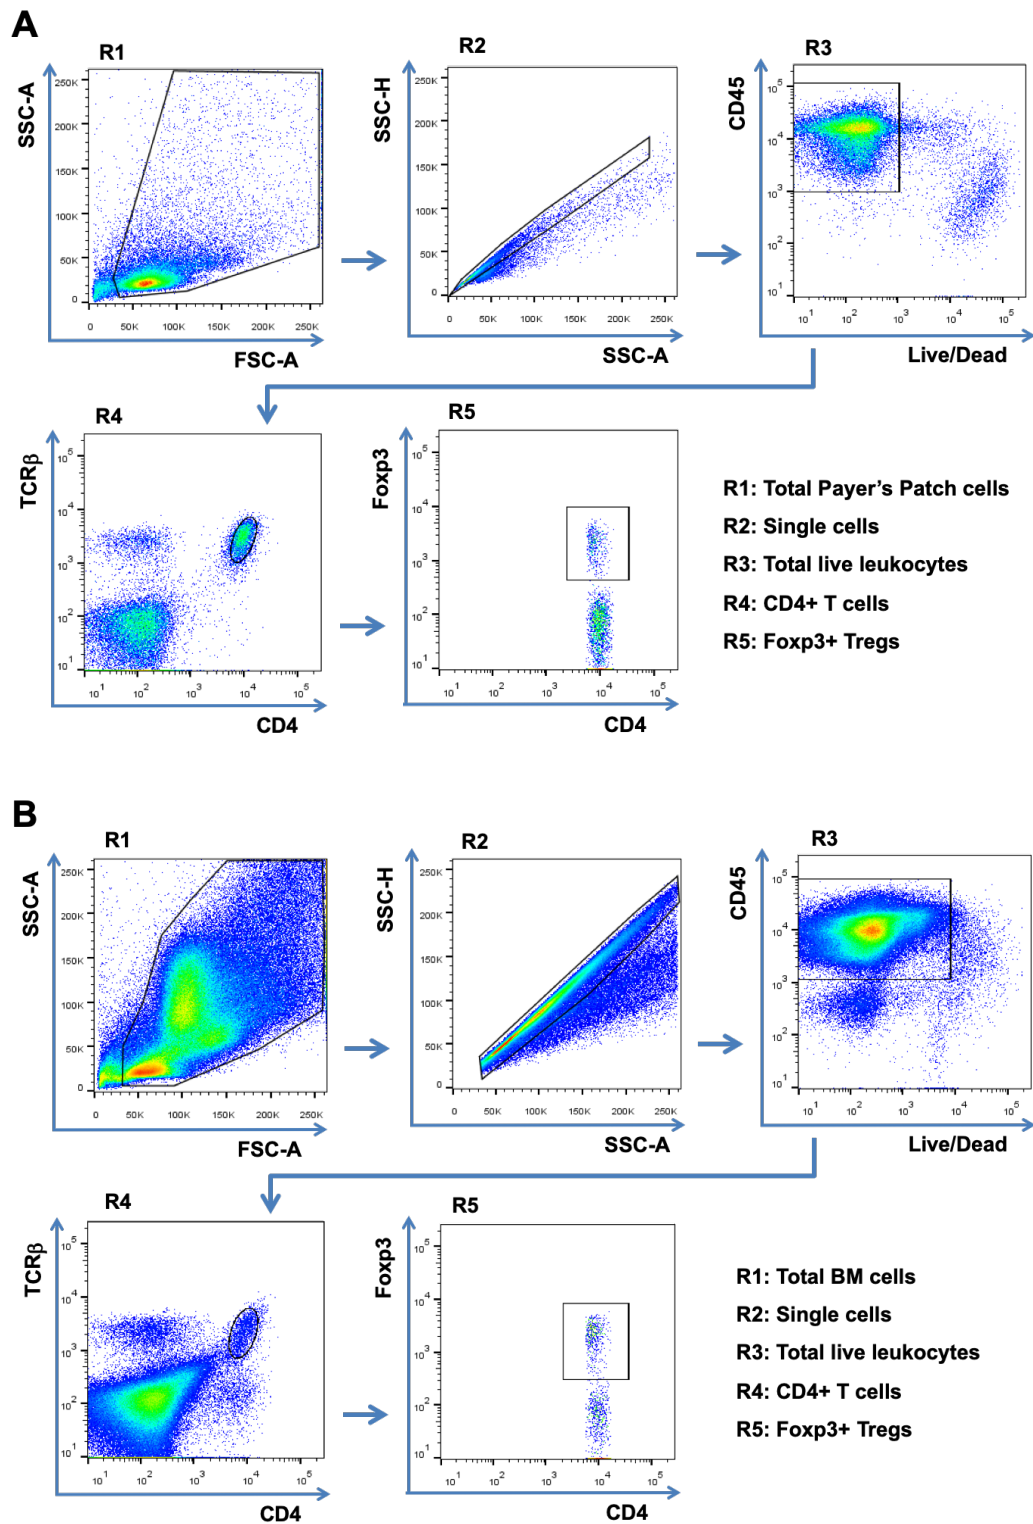

**Supplemental figure 4. Gating strategy used to identify PP (Panel A) and BM. (Panel B) Treg cells by flow cytometry.** Following red cells lysis, single cell suspensions were prepared from BM, and stained with antibodies to the indicated antigens and live/dead cell dye. Gating regions are numbered from R1 to R5. The figure shows one representative gating of flow cytometric plot.

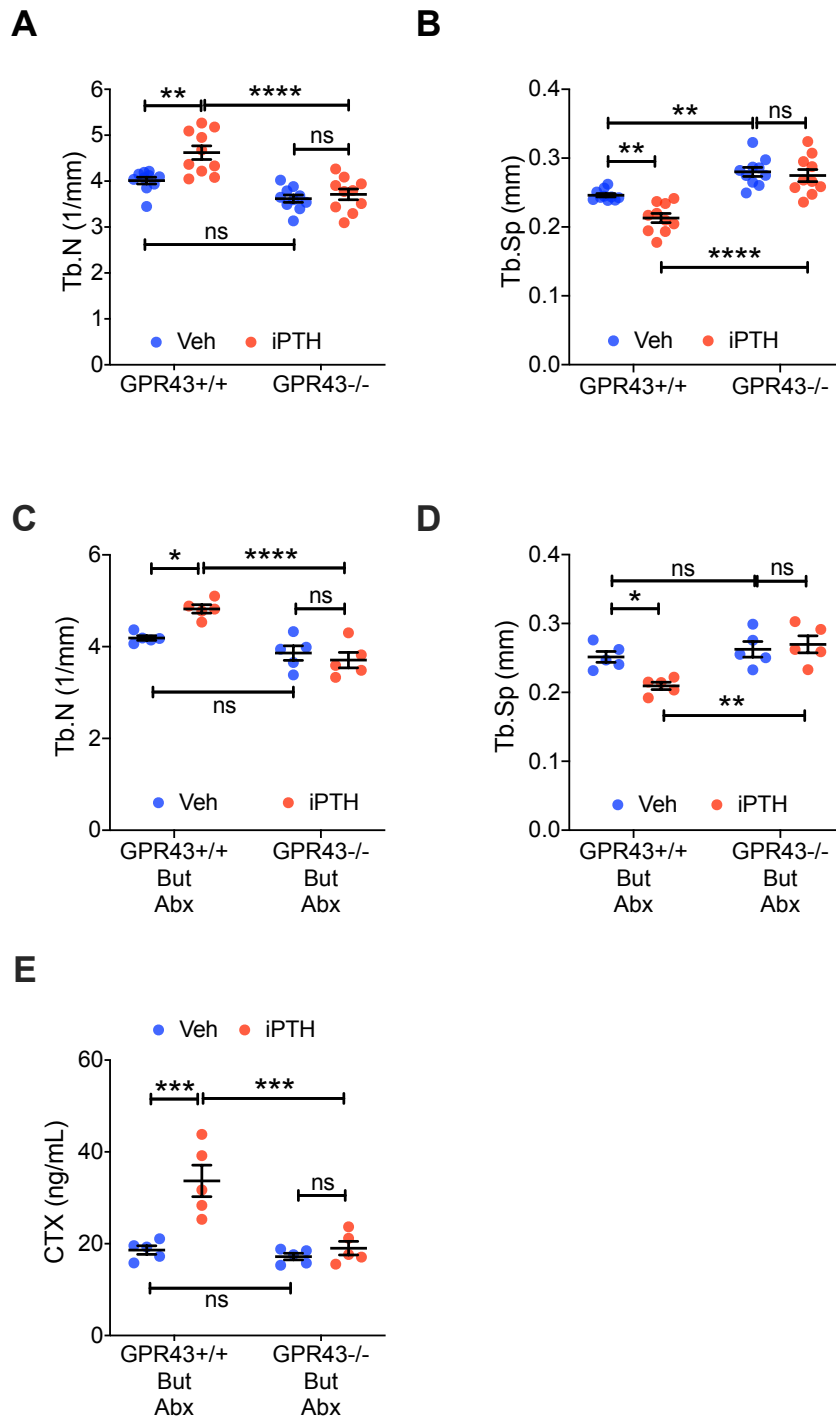

**Supplemental figure 5. iPTH and butyrate do not improve indices of trabecular bone structure and serum CTX levels in GPR43<sup>-/-</sup> mice.** **A, B.** Effect of iPTH on trabecular Number (Tb.N) and Trabecular Separation (Tb.Sp) as measured by in vitro  $\mu$ CT scanning in 12-week-old GPR43<sup>-/-</sup> mice and WT littermates.  $n = 10$  mice per group. **C-E.** Effect of iPTH on Tb.N, Tb.Sp, and serum CTX in GPR43<sup>-/-</sup> mice and WT littermates treated with antibiotics (Abx) and butyrate (But).  $n = 5$  mice per group. Data are expressed as Mean  $\pm$  SEM. All data were normally distributed according to the Shapiro-Wilk normality test. Data were analyzed by two-way ANOVA and post hoc tests applying the Bonferroni correction for multiple comparisons. \* =  $p < 0.05$ , \*\* =  $p < 0.01$ , \*\*\* =  $p < 0.001$  and \*\*\*\* =  $p < 0.0001$  compared to the indicated group. ns = not significant.
